# Supplementary material for: Centimeter-sized biomimetic bone constructs fabricated via CBD-BMP2-collagen microcarriers and BMSC-gelatin microspheres
Source: Royal Society of Chemistry journal article supplement (doi:10.1039/c5tb02048d), 2015-12-09
Supplement: c5tb02048d1.pdf [file c5tb02048d1.pdf]

## Supporting information

**Fig. S1** (a) SEM image of gelatin microspheres without cells, scale bar = 10  $\mu\text{m}$ . (b) WST assay of cells cultured on the gelatin microspheres.

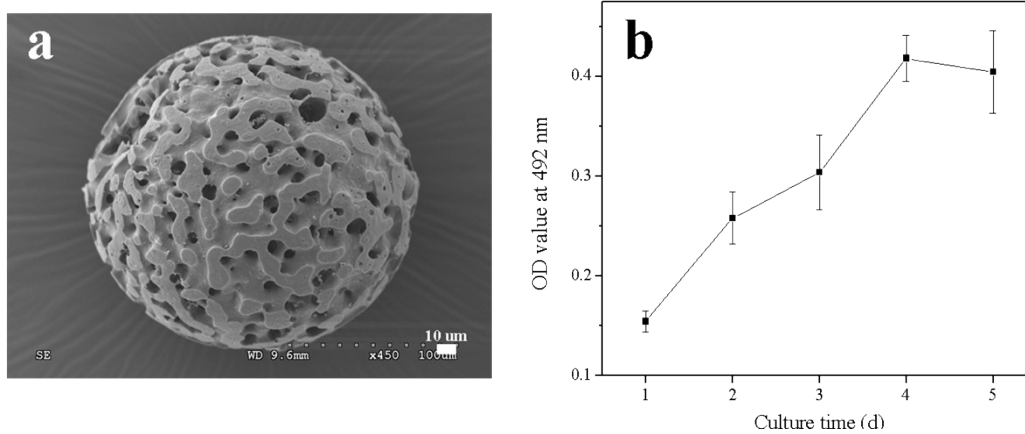

**Fig. S2** (a) Cell perfusion culture system. Perfusion pump (b) and perfusion chamber (c).

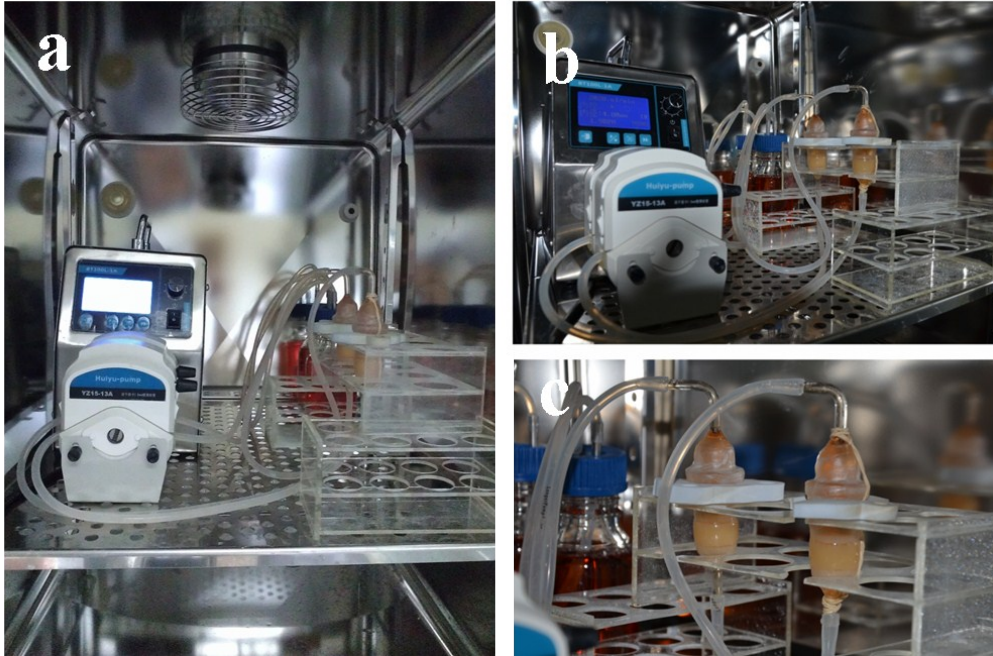

**Fig. S3** ALP staining and Alizarin red staining of *in vitro* samples with (a, b) and without (c, d) CCM respectively. EDX analysis of *in vitro* test (e) and control (f) group. DNA concentration (g). Stress-strain curve of compression test (h). Compression modulus (i). \* represents the difference is no statistically significant ( $p > 0.05$ ), \*\* represents the difference is statistically significant ( $p < 0.05$ ).

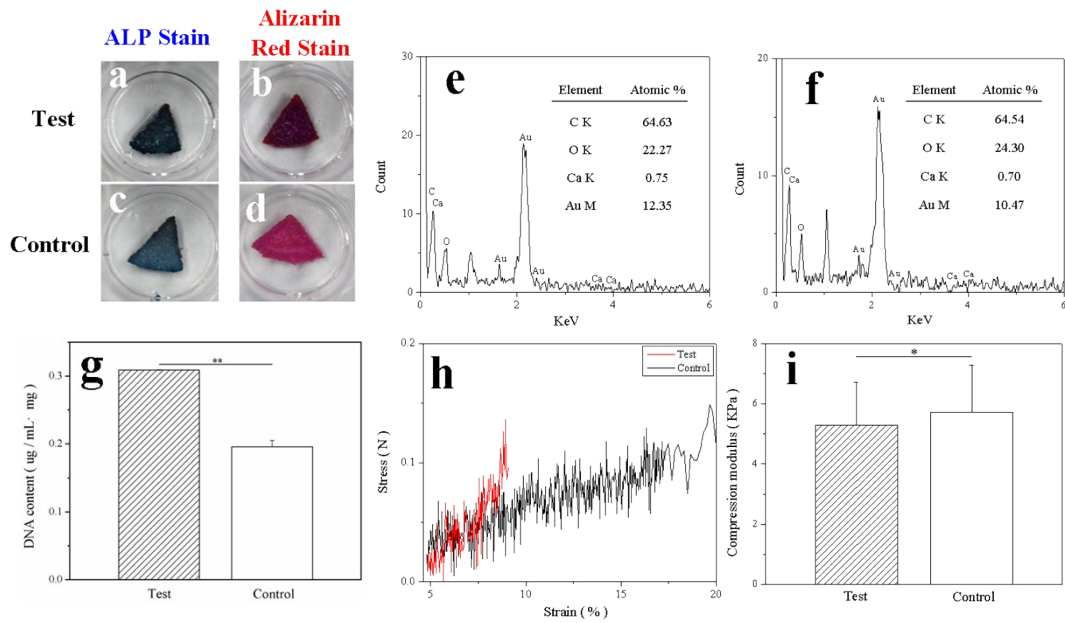

**Fig. S4** Injected rats fed for 0 week (a), 1 week (b), 2 weeks (c), 3 weeks (d) and 4 weeks (e). The test BGM/CCM group (a1), the control 1 BGM group (a2) and the control 2 CCM group (a3) respectively.

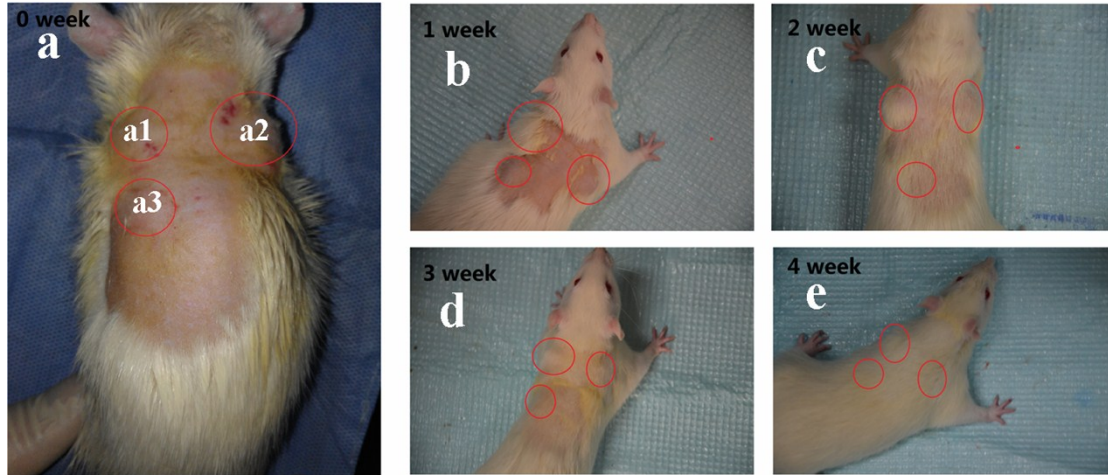

**Fig. S5** *In vivo* constructed bone-like tissue. (a) The tissue obtained from the CCM group as control 2; (b) Gross view of the tissue obtained from the BGM/CCM group as test, BGM group as control 1 and CCM group as control 2. (c) Micro-CT analysis of the injected rats. EDX analysis of the test (d) and control (e) sample. RT-PCR results of sample 2 (f) and sample 3 (g).

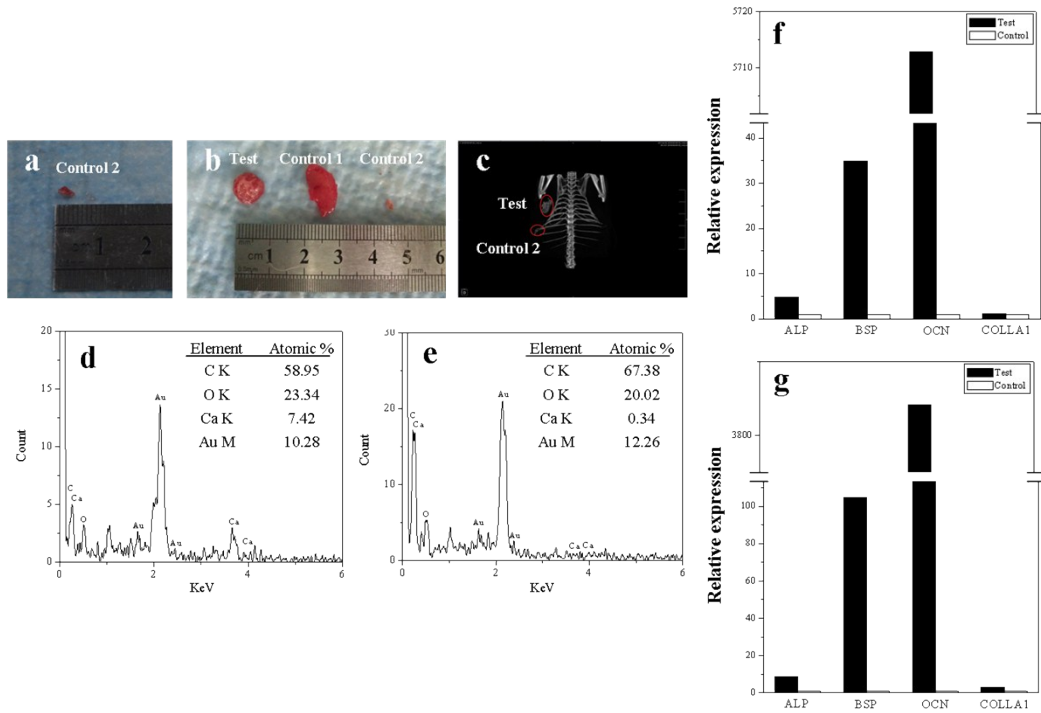

**Table S1** Primers designed for RT-PCR

| <b>Gene</b>                | <b>Forward Primer</b> | <b>Reverse Primer</b>  |
|----------------------------|-----------------------|------------------------|
| Alkaline phosphatase (ALP) | CCGATCGGGACTGGTACTC   | TCAGTTCTGTTCTTGGGGTACA |
| Bone sialoprotein (BSP)    | CGGCCACGCTACTTTCTTTA  | CCCTCCTCCTCCGA ACTATC  |
| Osteocalcin (OCN)          | GAGGGCAGTAAGGTGGTGAA  | GTCCGCTAGCTCGTCACAAT   |
| Collagen type I (COLLA1)   | CATGTTACGCTTTGTGGACCT | GGTTTCCACGTCTCACCATT   |
| GAPDH                      | AGAGACAGCCGCATCTTCTTG | ACCGACCTCACCATCTTGCTA  |
